# Supplementary material for: Monthly Variation in Mycosporine-like Amino Acids from Red Alga Dulse (Devaleraea inkyuleei, Formerly Palmaria palmata in Japan)
Source: MDPI journal article supplement (doi:10.3390/phycology3010008), 2023-02-09
Supplement: s1 [file s1]

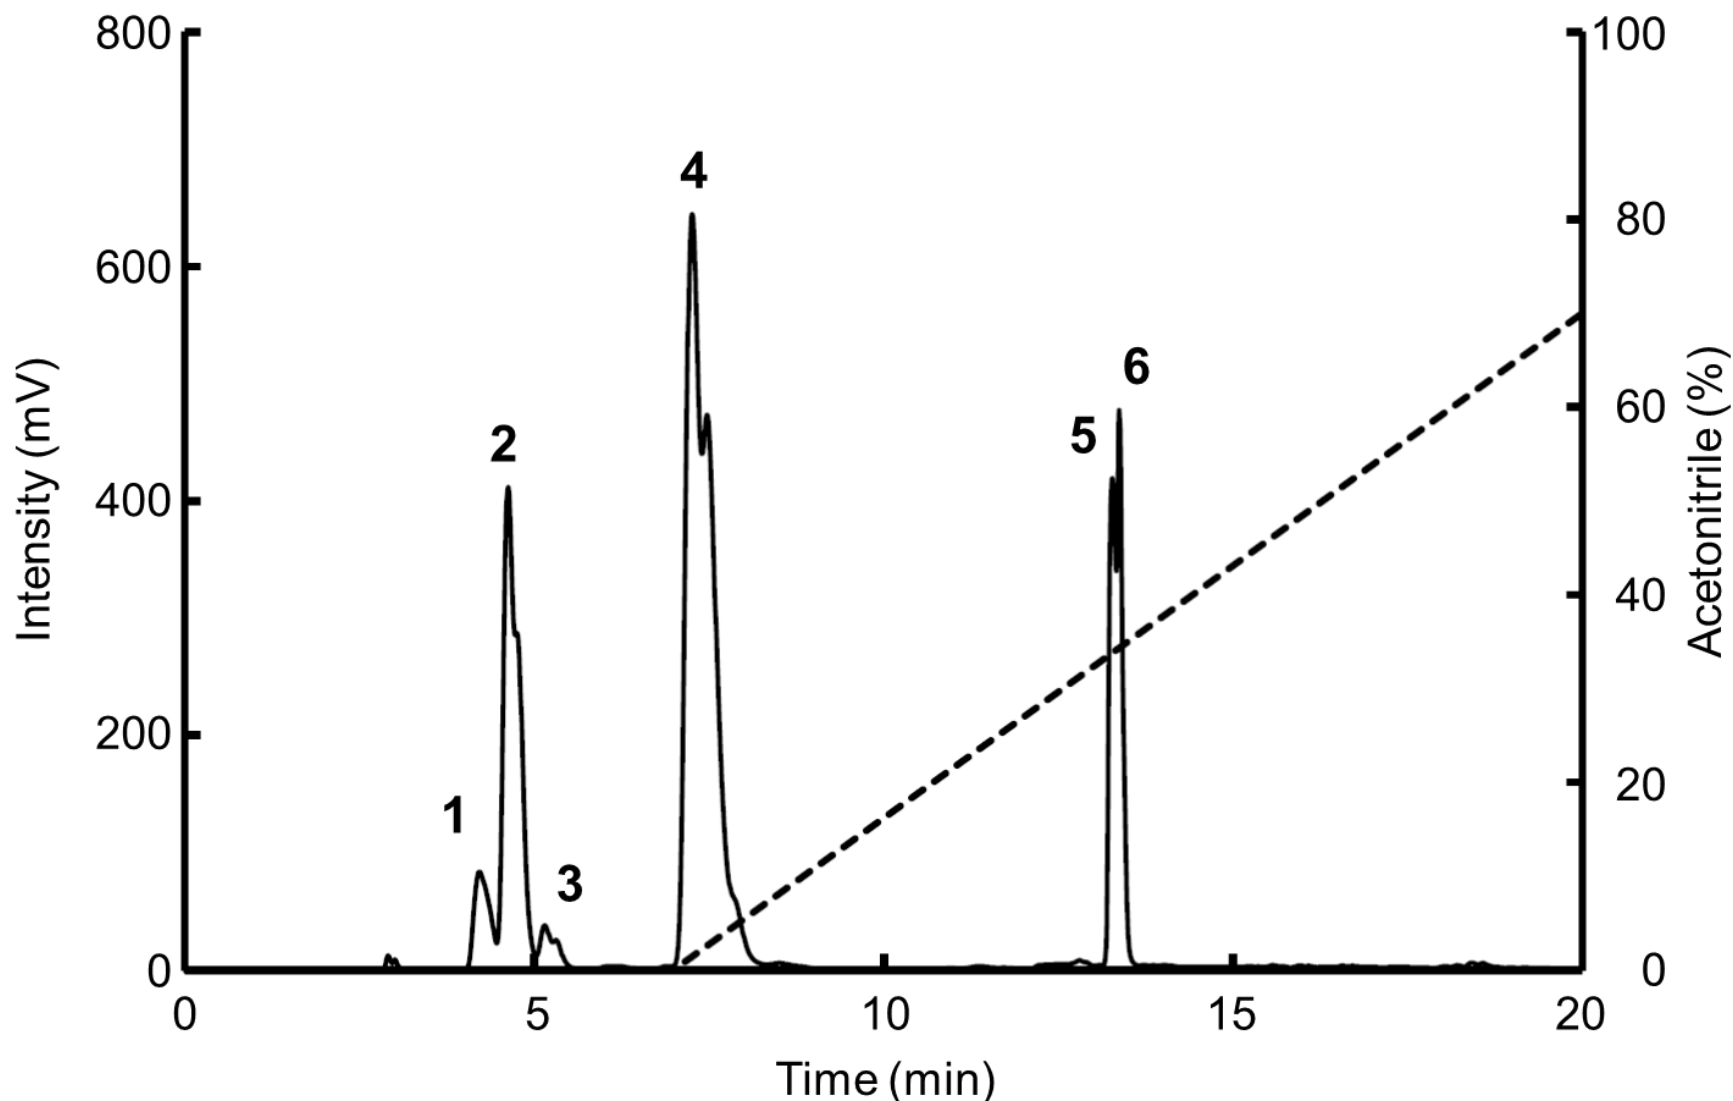

**Supplementary Figure S1.** HPLC chromatogram of dulce crude MAAs solution.

MAAs were isolated by reversed-phase HPLC using a Mightysil RP-18GP column (5  $\mu$ m, 10  $\times$  250 mm) (Kanto Kagaku, Tokyo, Japan), with the column oven set to 40  $^{\circ}$ C and a detection wavelength of 330 nm, using an isocratic elution of pure water containing 0.1% TFA for 7 min, and a linear gradient of acetonitrile (0–70%) containing 0.1% TFA for 13 min, at a flow rate of 4.73 mL/min. The data represents the typical MAA peaks: (1), shinorine; (2), palythine; (3), Asterina-330; (4), porphyra-334; (5), usujirene; (6) palythene.
